# Supplementary material for: ERCC6L promotes the progression of hepatocellular carcinoma through activating PI3K/AKT and NF-κB signaling pathway
Source: PubMed Central journal article supplement (PMC7487553; doi:10.1186/s12885-020-07367-2), 2020-09-05

# Original Blots Figure 2B

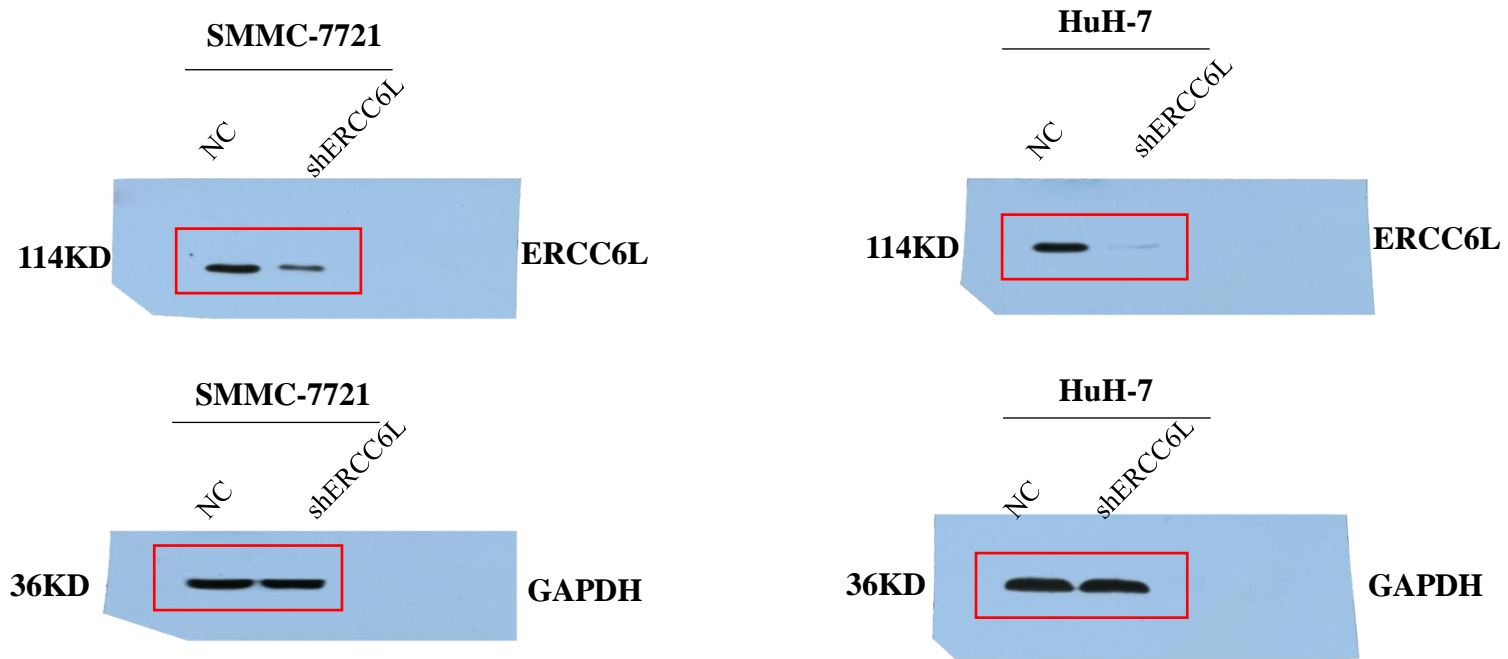

# Original Blots Figure 4A

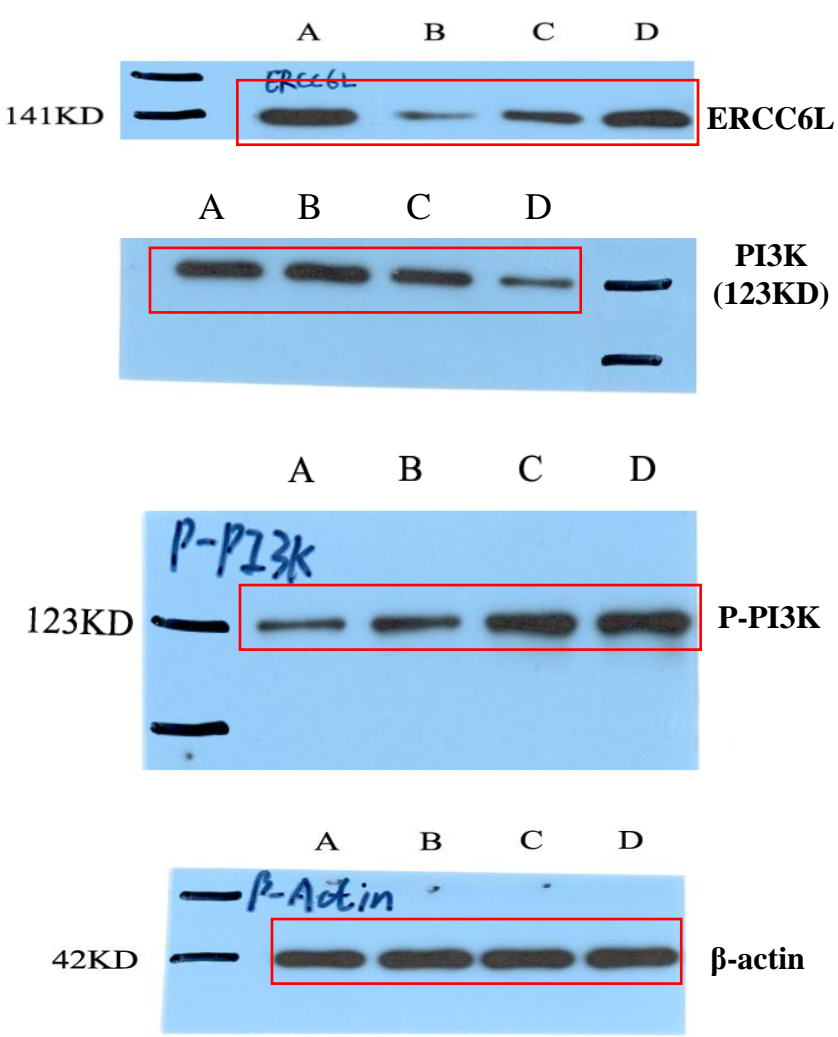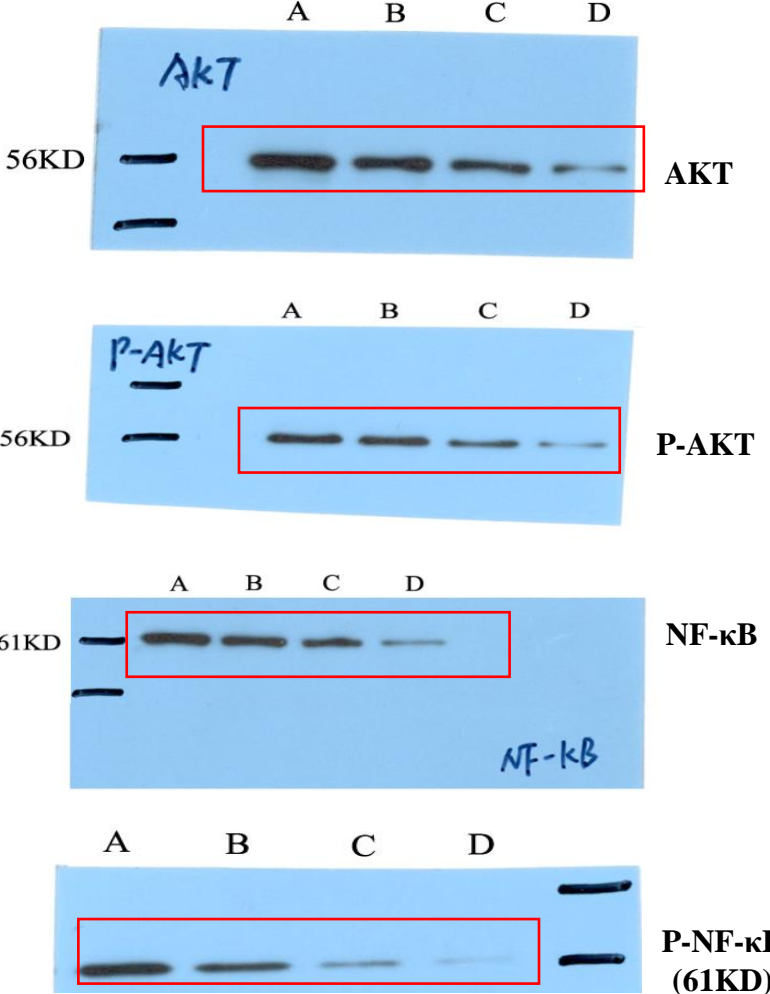

**A: ERCC6L**  
**B: NC**  
**C: shERCC6L**  
**D: ERCC6L+deguelin**

# Original Blots Figure 4B

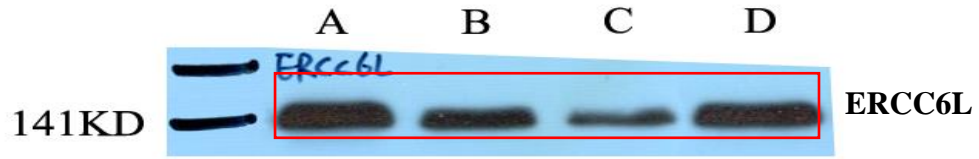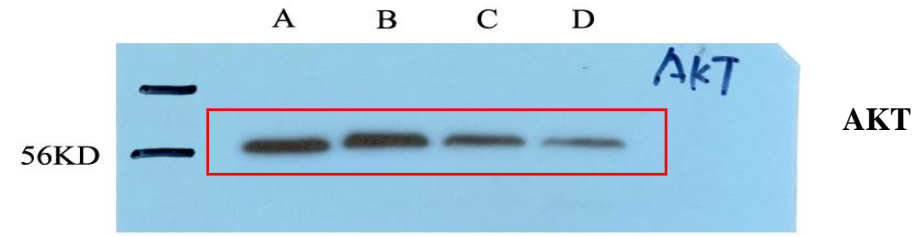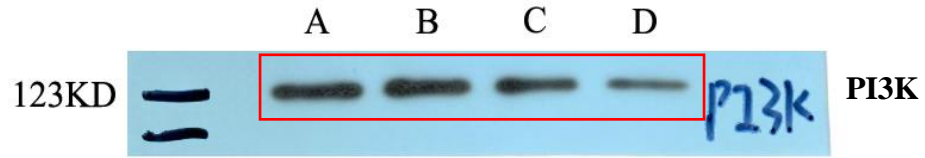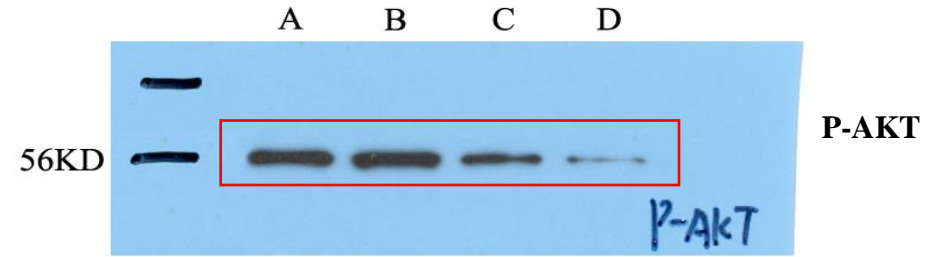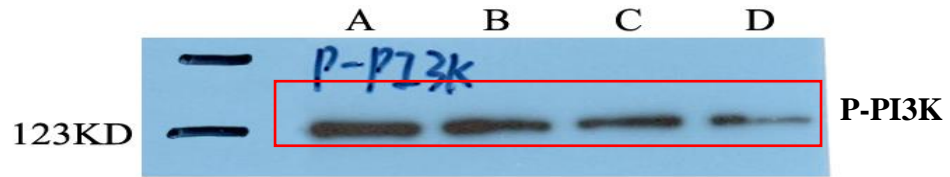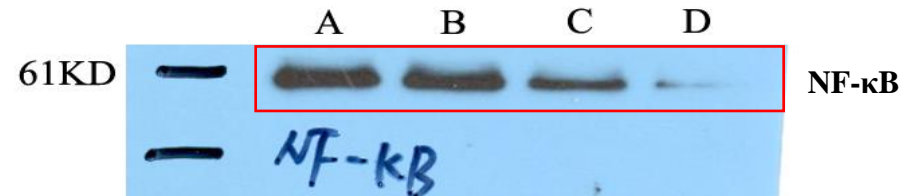

**A: ERCC6L**  
**B: NC**  
**C: shERCC6L**  
**D: ERCC6L+deguelin**

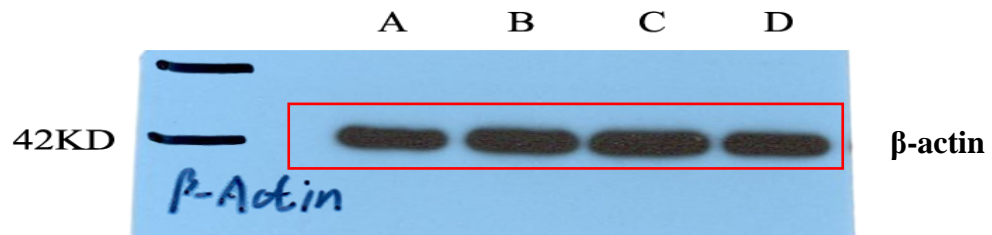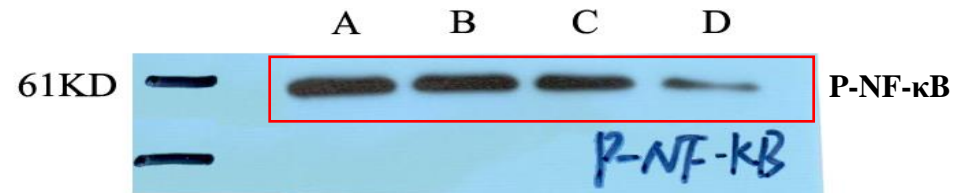

Supplement: 12885_2020_7367_MOESM1_ESM.pdf [file 12885_2020_7367_MOESM1_ESM.pdf]
